# Supplementary material
Source: publisher figshare collection journal article supplement (https://tandf.figshare.com/ndownloader/files/18786089)
Supplement: Supplementary file 1 [file 18786089]

**Supplemental Table 1: Self-reported prices per gram of dried cannabis at last purchase by province in Canada** (n=891)
